# Supplementary material for: Solid-State Preparation and Characterization of 2-Hydroxypropylcyclodextrins-Iodine Complexes as Stable Iodophors
Source: MDPI journal article supplement (doi:10.3390/biom13030474), 2023-03-03
Supplement: s1 [file s1]

# Solid-State Preparation and Characterization of 2-Hydroxypropylcyclodextrins-Iodine Complexes as Stable Iodophors

Sandro Dattilo <sup>1</sup>, Fabiola Spitaleri <sup>2</sup>, Danilo Aleo <sup>2,\*</sup>, Maria Grazia Saita <sup>2</sup> and Angela Patti <sup>3,\*</sup>

<sup>1</sup> CNR-Istituto per i Polimeri, Compositi e Biomateriali, Via Paolo Gaifami 18, I-95126 Catania, Italy

<sup>2</sup> MEDIVIS-Via Carnazza 34 C, I-95030 Catania, Italy

<sup>3</sup> CNR-Istituto di Chimica Biomolecolare, Via Paolo Gaifami 18, I-95126 Catania, Italy

\* Correspondence: danilo.aleo@medivis.it (D.A.); angela.patti@cnr.it (A.P.)

|                                                                                                                        |           |
|------------------------------------------------------------------------------------------------------------------------|-----------|
| Validation of the UV method for iodine determination                                                                   | Page SI-1 |
| <b>Table S1.</b> ANOVA one factor analysis ( $\alpha=0.05$ )                                                           | SI-2      |
| <b>Figure S1.</b> IR spectra of HP- $\beta$ -CD and HP- $\beta$ -CD/I <sub>2</sub> complex                             | SI-3      |
| <b>Figure S2.</b> TG curves of HP- $\alpha$ -CD/I <sub>2</sub> complex and the pure components                         | SI-4      |
| <b>Figure S3.</b> TG curves of HP- $\gamma$ -CD/I <sub>2</sub> complex and the pure components                         | SI-4      |
| <b>Figure S4.</b> TG curves of HP- $\alpha$ -CD/I <sub>2</sub> complexes prepared with different methods               | SI-5      |
| <b>Figure S5.</b> TG curves of HP- $\gamma$ -CD/I <sub>2</sub> complexes prepared with different methods               | SI-5      |
| <b>Figure S6.</b> XPS survey spectrum of HP- $\beta$ -CD and HP- $\beta$ -CD/I <sub>2</sub> (SH sample) solids         | SI-6      |
| <b>Table S2.</b> Accelerated stability test on solid iodine-cyclodextrin complexes                                     | SI-7      |
| <b>Figure S7.</b> Variation of iodine content of iodine-cyclodextrin complexes on storage at 25 °C in polyethylene bag | SI-7      |
| <b>Table S3.</b> Variation of iodine content of iodine-cyclodextrin complexes in solution                              | SI-8      |
| <b>Table S4.</b> % Inhibition of <i>S. epidermis</i> cell viability                                                    | SI-8      |

## Validation of the UV method for iodine determination

### Linearity and Range

For linearity study, six solutions having different iodine concentration in the range 0.0045-0.0165 mg/g were analyzed. The obtained data were fitted to the model  $y = ax + b$  using least-squares regression and a linear relationship with the equation  $y = 102.07x + 0.0196$  ( $R^2 = 0.9999$ ) was found over the considered range.

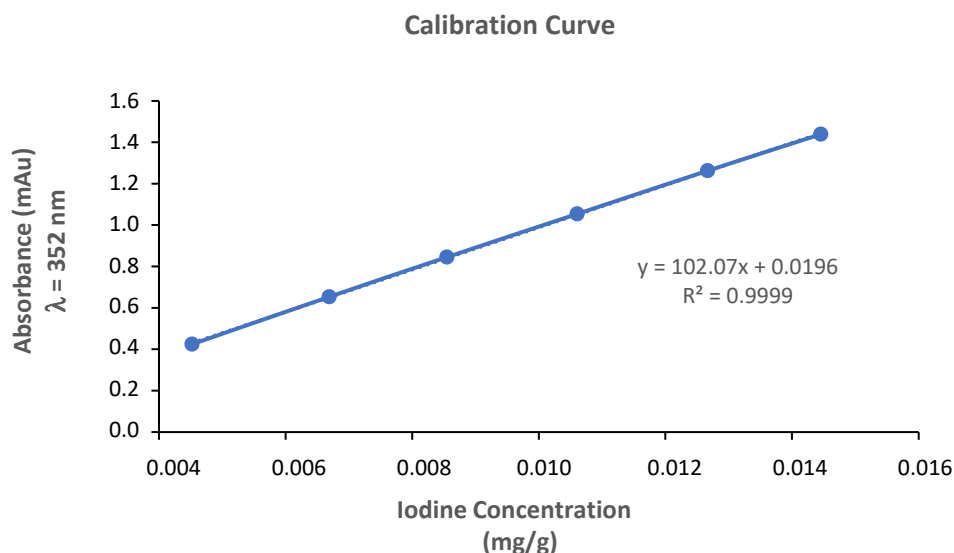

### Accuracy

Accuracy of the method was studied by recovery experiments. The recovery was performed at three levels, 0.090, 0.10 and 0.13 mg/g of iodine concentrations using PVP-I as reference standard. Six samples were prepared for each recovery level. The percentage recoveries were calculated from the calibration curve. Accuracy is given as  $M \pm \left(\frac{SD}{\sqrt{n}}\right) t$ , where M is the overall mean value from recovery testing, SD is the Standard Deviation, and t is the *student's t* (0.05, 18) = 2.101. From the data accuracy of  $99.2\% \pm 0.40\%$  and RSD = 0.80% were determined.

### Precision

The precision of the analytical method was obtained as intra-day variation (repeatability) and inter-day variation (intermediate precision) studies.

Intra-day and inter-day data were taken from the recoveries of six independent samples of PVP-I (iodine concentration 0.010%) in the same day and in three different days, respectively.

The coefficient of variation of the repeatability  $CV_r$  and the coefficient of variation of the intermediate precision  $CV_R$  were determined by one-way analysis of variance (ANOVA) by setting a significance level  $\alpha=0.05$  (Table SI-1).

| <b>Table S1: ANOVA one factor analysis (<math>\alpha=0.05</math>)</b> |                                                                                |       |
|-----------------------------------------------------------------------|--------------------------------------------------------------------------------|-------|
| <b>Repeatability</b>                                                  | Intra assay variance ( $S_r^2$ )                                               | 0.28  |
|                                                                       | Standard deviation intra assay ( $S_r$ )= $\sqrt{S_r^2}$                       | 0.53  |
|                                                                       | <b>CV<sub>r</sub></b> repeatability (100 x $S_r/M$ )                           | 0.53% |
| <b>Intermediate precision</b>                                         | Intermediate precision variance ( $S_R^2$ ) = $[(S_r^2)+(S_{xm}^2-S_r^2/n)]^a$ | 0.54  |
|                                                                       | Standard deviation Inter assay ( $S_R$ )= $\sqrt{S_R^2}$                       | 0.74  |
|                                                                       | <b>CV<sub>R</sub></b> Intermediate precision (100 x $S_r/M$ )                  | 0.74% |
| <sup>a</sup> $S_{xm}^2$ = Variance of mean                            |                                                                                |       |

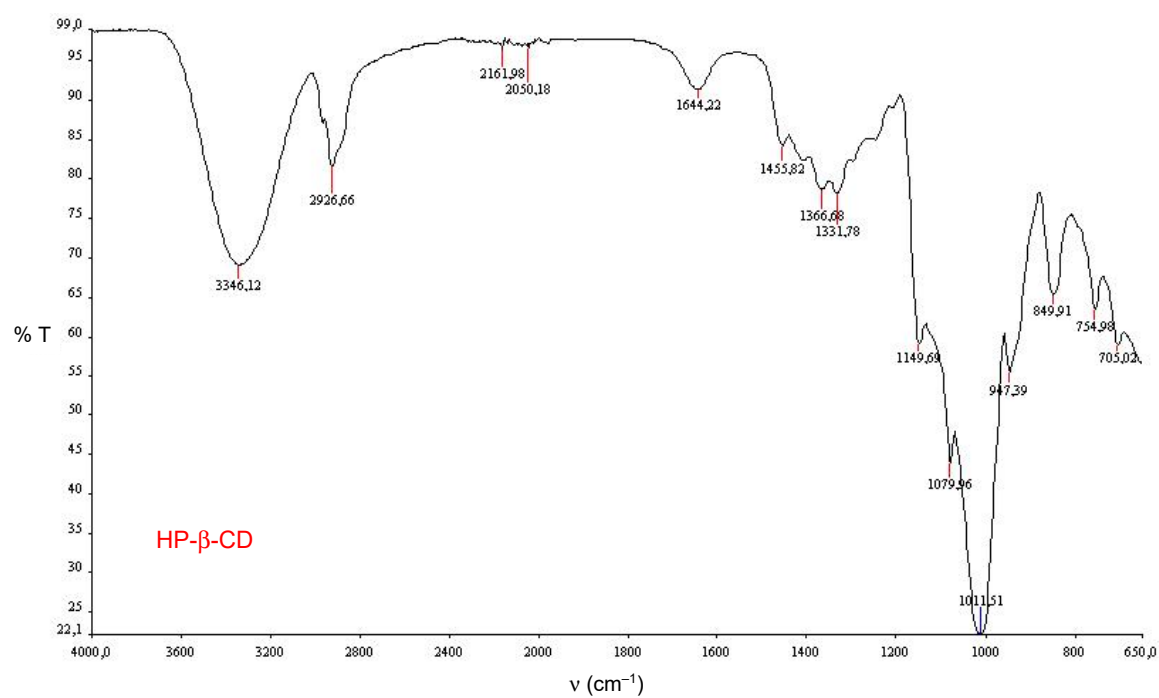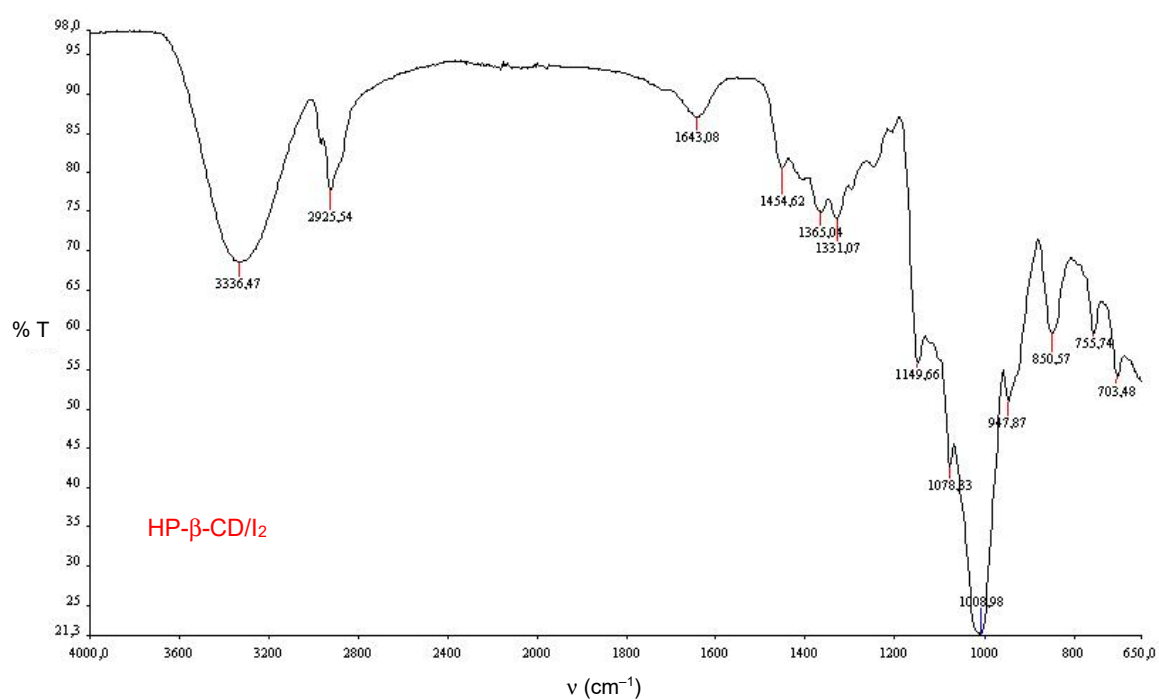

**Figure S1.** IR spectra of HP-β-CD (top) and HP-β-CD/ $\text{I}_2$  complex (down)

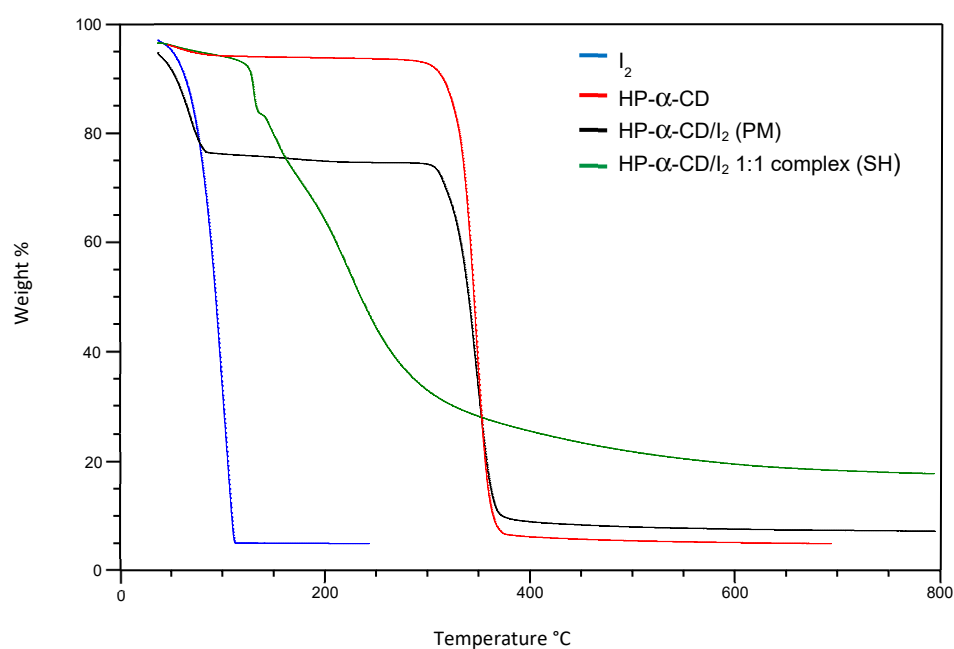

**Figure S2.** TG curves of iodine and HP- $\alpha$ -CD as pure components, their 1:1 physical mixture (PM) and 1:1 complex prepared by sealed heating (SH) method

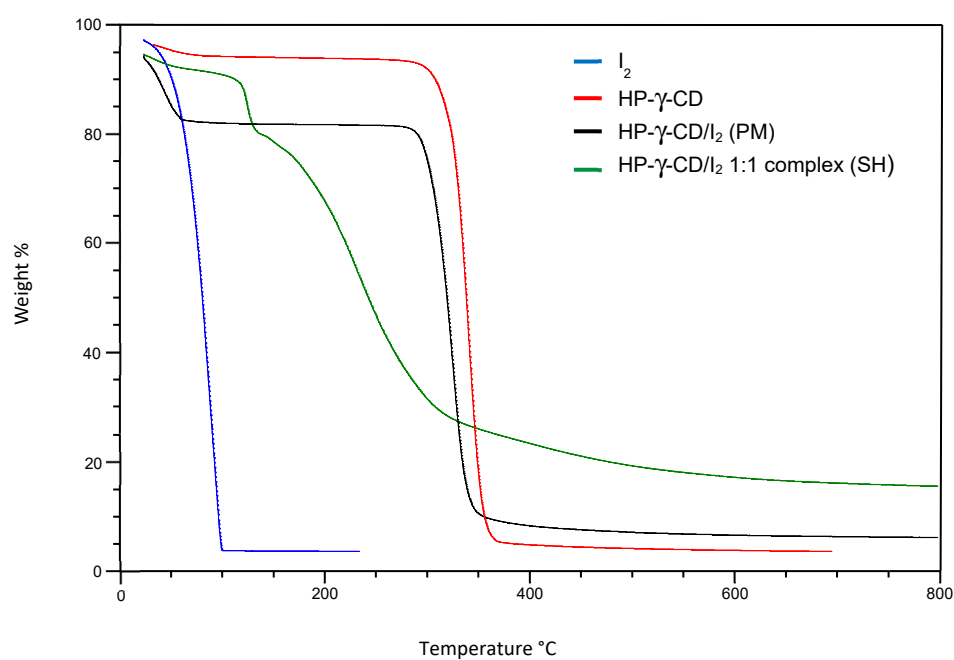

**Figure S3.** TG curves of iodine and HP- $\gamma$ -CD as pure components, their 1:1 physical mixture (PM) and 1:1 complex prepared by sealed heating (SH) method

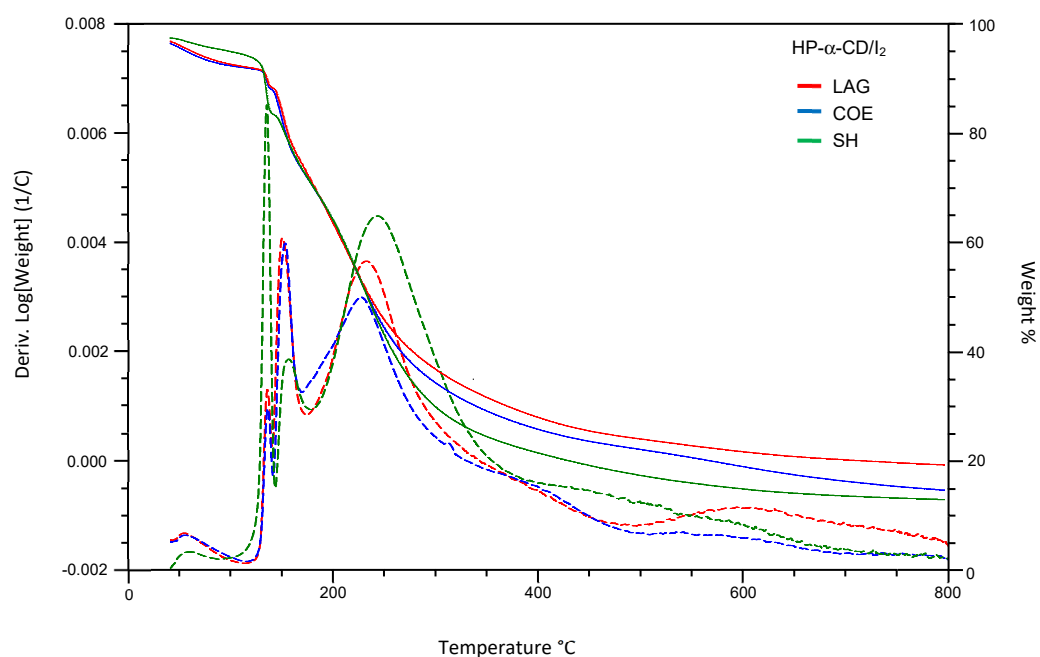

**Figure S4.** TG (solid lines) and first derivative (dotted lines) curves of HP- $\alpha$ -CD/I<sub>2</sub> complexes prepared by liquid-assisted grinding (LAG), co-evaporation (COE) and sealed heating (SH) methods

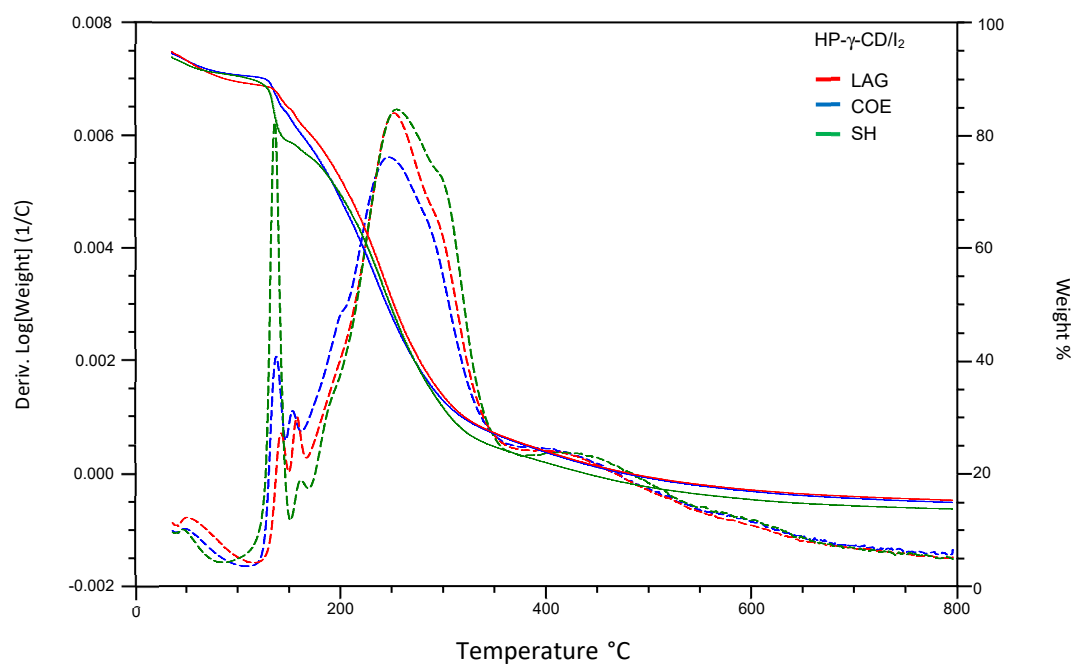

**Figure S5.** TG (solid lines) and first derivative (dotted lines) curves of HP- $\gamma$ -CD/I<sub>2</sub> complexes prepared by liquid-assisted grinding (LAG), co-vaporation (COE) and sealed heating (SH) methods.

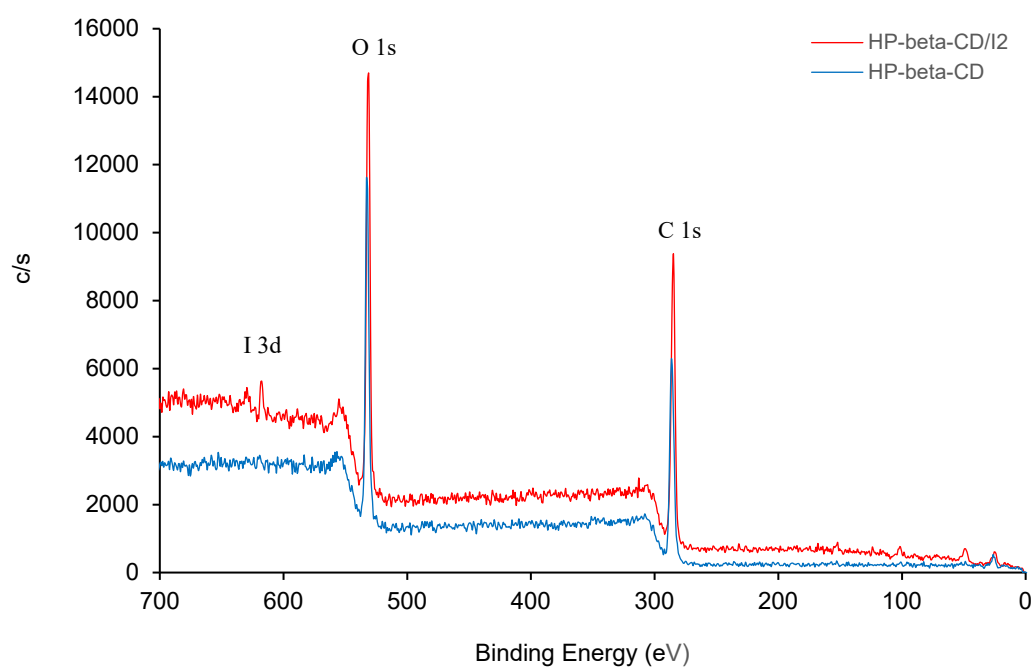

**Figure S6.** XPS survey spectrum of HP- $\beta$ -CD and HP- $\beta$ -CD/I<sub>2</sub> (SH sample) solids

**Table S2.** Accelerated stability test on solid iodine-cyclodextrin complexes<sup>a</sup>

| Cyclodextrin     | Preparation method | % I <sub>2</sub> (w/w) |                           |                           |                           |                           |                            |                            |                            |
|------------------|--------------------|------------------------|---------------------------|---------------------------|---------------------------|---------------------------|----------------------------|----------------------------|----------------------------|
|                  |                    | <i>t</i> = 0           | <i>t</i> = 1 <sup>b</sup> | <i>t</i> = 2 <sup>b</sup> | <i>t</i> = 6 <sup>b</sup> | <i>t</i> = 7 <sup>b</sup> | <i>t</i> = 14 <sup>b</sup> | <i>t</i> = 21 <sup>b</sup> | <i>t</i> = 28 <sup>b</sup> |
| HP- $\alpha$ -CD | SH                 | 10.81±0.01             | 10.29±0.05                | 10.02±0.01                | 9.73±0.05                 | 9.56±0.06                 | 9.20±0.04                  | 8.59±0.02                  | 8.09±0.01                  |
| HP- $\alpha$ -CD | LAG                | 10.60±0.08             | 10.10±0.03                | 9.66±0.05                 | 9.21±0.06                 | 9.14±0.03                 | 8.86±0.02                  | 8.83±0.03                  | 8.61±0.01                  |
| HP- $\alpha$ -CD | COE                | 9.45±0.03              | 9.19±0.02                 | 9.03±0.04                 | 8.82±0.03                 | 8.80±0.06                 | 8.82±0.04                  | 8.74±0.04                  | 8.73±0.02                  |
| HP- $\beta$ -CD  | SH                 | 9.64±0.03              | 8.98±0.05                 | 8.46±0.02                 | 7.74±0.03                 | 7.43±0.08                 | 6.98±0.06                  | 6.79±0.04                  | 6.40±0.01                  |
| HP- $\beta$ -CD  | LAG                | 5.14±0.05              | 4.92±0.03                 | 4.70±0.04                 | 4.38±0.03                 | 4.31±0.06                 | 4.16±0.04                  | 4.03±0.03                  | 3.69±0.01                  |
| HP- $\beta$ -CD  | COE                | 6.01±0.04              | 5.92±0.03                 | 5.81±0.05                 | 5.56±0.04                 | 5.58±0.04                 | 5.47±0.03                  | 5.53±0.06                  | 5.36±0.02                  |
| HP- $\gamma$ -CD | SH                 | 8.32±0.11              | 7.10±0.07                 | 6.49±0.05                 | 4.60±0.07                 | 4.28±0.07                 | 3.94±0.05                  | 3.54±0.06                  | 3.22±0.01                  |
| HP- $\gamma$ -CD | LAG                | 5.56±0.03              | 5.18±0.01                 | 4.91±0.02                 | 4.63±0.01                 | 4.46±0.01                 | 4.50±0.02                  | 4.42±0.03                  | 4.39±0.05                  |
| HP- $\gamma$ -CD | COE                | 6.77±0.06              | 6.48±0.07                 | 6.23±0.05                 | 5.57±0.04                 | 5.50±0.05                 | 4.99±0.06                  | 4.76±0.04                  | 4.57±0.03                  |

<sup>a</sup>Each solid iodine-cyclodextrin complex was spread in a glass Petri dish (40 mm diameter) and stored at 40 °C in oven; <sup>b</sup>Time in days

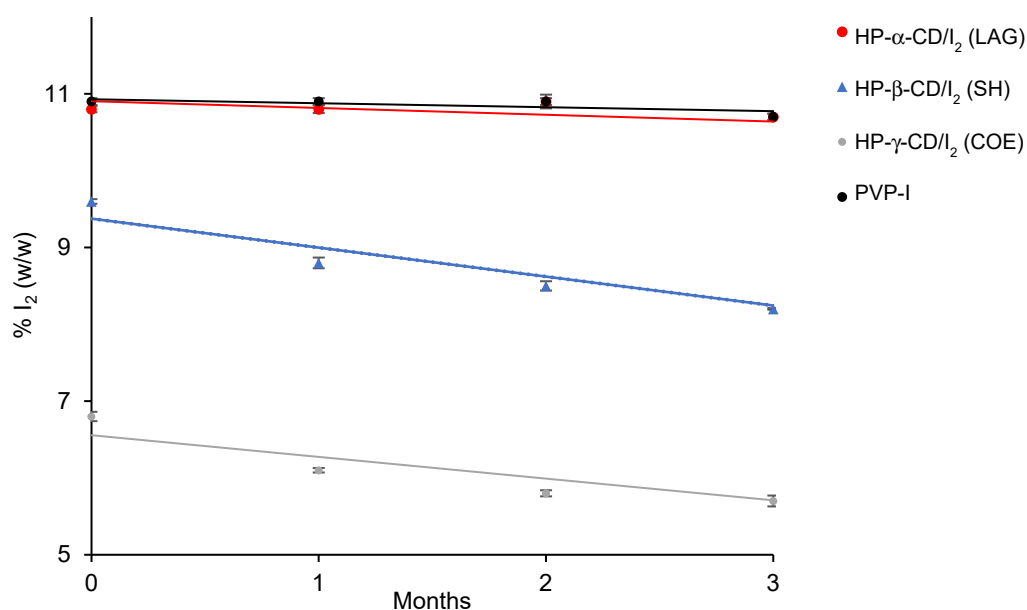

**Figure S7.** Variation of the iodine content in solid complexes with 2-hydroxypropylcyclodextrins on storage at 25 °C in low-density polyethylene bag



**Table S3.** Variation of iodine content of iodine-cyclodextrin complexes in solution<sup>a</sup>

| Cyclodextrin       | Preparation method | % I <sub>2</sub> (w/w) |           |           |           |
|--------------------|--------------------|------------------------|-----------|-----------|-----------|
|                    |                    | $t = 0$                | $t = 1^b$ | $t = 2^b$ | $t = 3^b$ |
| HP- $\alpha$ -CD   | SH                 | 10.78±0.04             | 8.10±0.03 | 6.78±0.04 | 5.97±0.08 |
| HP- $\alpha$ -CD   | LAG                | 10.61±0.09             | 6.63±0.09 | 5.59±0.07 | 4.72±0.02 |
| HP- $\alpha$ -CD   | COE                | 9.42±0.08              | 6.16±0.02 | 5.10±0.06 | 4.25±0.04 |
| HP- $\beta$ -CD    | SH                 | 9.59±0.05              | 1.62±0.06 | 0.64±0.01 | 0         |
| HP- $\beta$ -CD    | LAG                | 5.13±0.05              | 1.24±0.06 | 0         | 0         |
| HP- $\beta$ -CD    | COE                | 6.02±0.07              | 1.01±0.04 | 0         | 0         |
| HP- $\gamma$ -CD   | SH                 | 8.31±0.02              | 0         | 0         | 0         |
| HP- $\gamma$ -CD   | LAG                | 5.64±0.07              | 0         | 0         | 0         |
| PVP-I <sup>c</sup> |                    | 10.89±0.07             | 4.84±0.01 | 0         | 0         |

<sup>a</sup>The iodine-cyclodextrin complex was dissolved in water at 0.25% (w/w) concentration and the solution was maintained at 25 °C; <sup>b</sup>Time in months; <sup>c</sup>PVI-I: povidone iodine taken as reference

**Table S4.** % Inhibition of *S. epidermis* cell viability<sup>a</sup>

| Compound                    | Time   |        |        |        |        |        |        |        |        |
|-----------------------------|--------|--------|--------|--------|--------|--------|--------|--------|--------|
|                             | 10s    | 20s    | 40s    | 1 min  | 2min   | 4 min  | 8 min  | 1h     | 6h     |
| HP- $\alpha$ -CD            | 100.00 | 100.00 | 100.00 | 100.00 | 100.00 | 100.00 | 100.00 | 100.00 | 100.00 |
| HP- $\beta$ -CD             | 100.00 | 100.00 | 100.00 | 100.00 | 100.00 | 100.00 | 100.00 | 100.00 | 100.00 |
| HP- $\gamma$ -CD            | 100.00 | 100.00 | 100.00 | 100.00 | 100.00 | 100.00 | 100.00 | 100.00 | 100.00 |
| PVP-I                       | 100.00 | 100.00 | 100.00 | 100.00 | 100.00 | 100.00 | 100.00 | 100.00 | 100.00 |
| Vehicle+Penicillin (2µg/mL) | 59.27  | 65.58  | 71.28  | 60.50  | 79.16  | 72.10  | 63.42  | 75.52  | 95.40  |
| Vehicle (PBS)               | 56.57  | 61.54  | 58.89  | 73.21  | 49.62  | 65.50  | 66.71  | 57.78  | 61.38  |

<sup>a</sup>Solutions of cyclodextrin-iodine complexes (SH samples) in 0.025% available iodine concentration were used
